# Supplementary material for: Anti-Inflammatory and Anti-Oxidant Effect of Dimethyl Fumarate in Cystic Fibrosis Bronchial Epithelial Cells
Source: MDPI journal article supplement (doi:10.3390/cells10082132), 2021-08-19
Supplement: s1 [file s1]

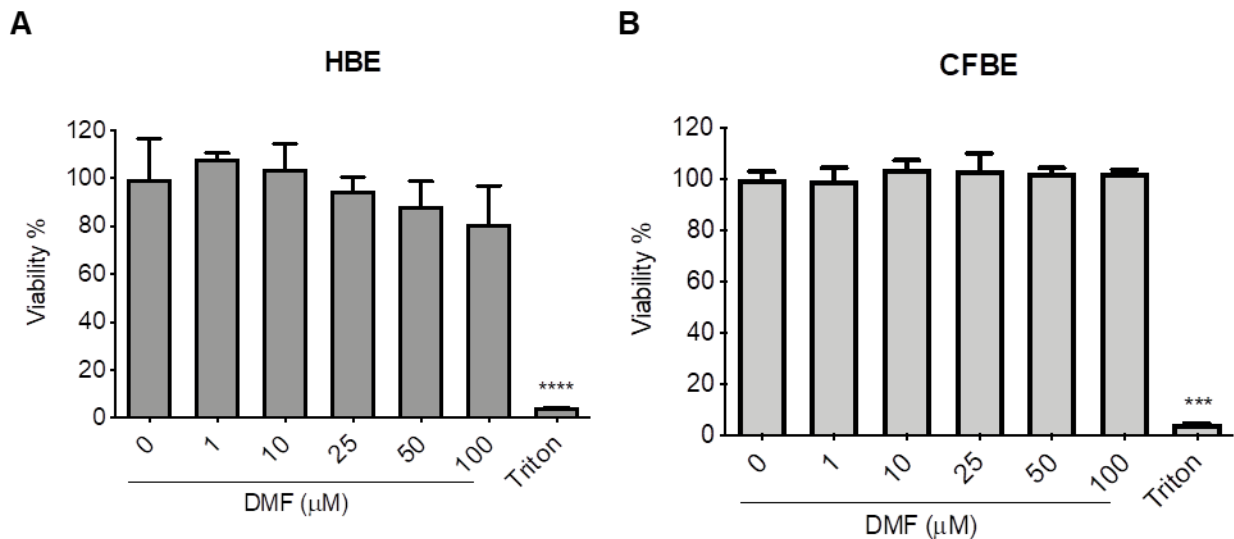

**Figure S1.** Cytotoxicity of DMF. HBE (A) and CFBE (B) cells were challenged with DMF for 24 h at the indicated concentrations (in mM). Cells were then assayed for vitality by the MTT assay. Untreated cells represented 100% of viability, whereas 1% Triton X-100 (Triton) was used as positive control. Data represent the mean  $\pm$  SD ( $n = 4$ ). \*\*\* $p < 0.001$ ; \*\*\*\* $p < 0.0001$  vs. untreated.

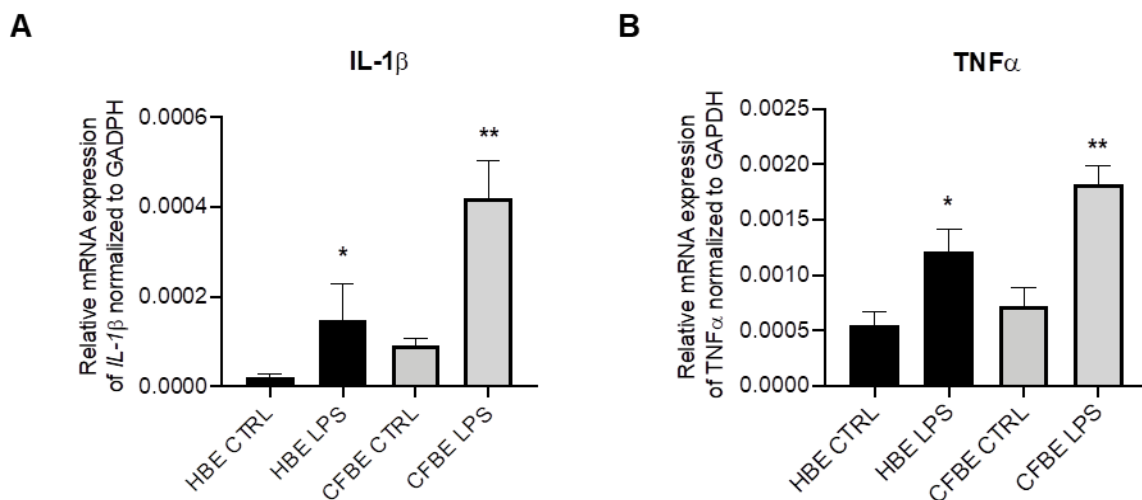

**Figure S2.** LPS-induced mRNA expression levels of primary inflammatory cytokines in HBE and CFBE cells. Cells were incubated with PBS or 10  $\mu$ g/mL LPS for 4 h. Total RNA was extracted and qRT-PCR was performed in order to quantify IL-1b (A) and TNF-a (B) mRNA normalized to GAPDH. Results are shown as DC<sub>T</sub> values. Data represent the mean  $\pm$  SD ( $n = 8$ ). \* $p < 0.05$ ; \*\* $p < 0.01$ .

**FIGURE S3**

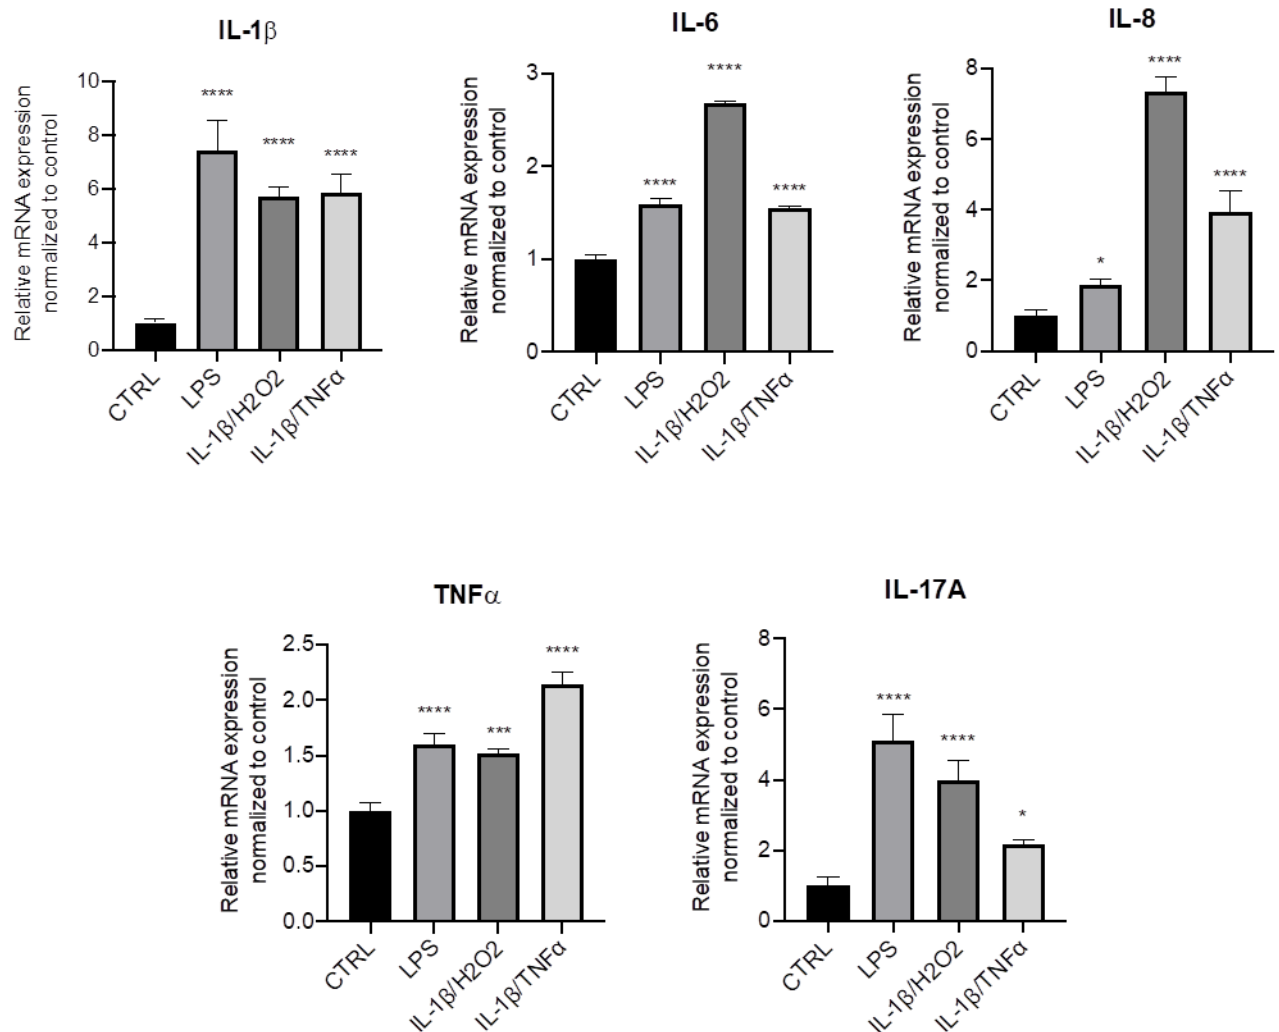

**Figure S3.** Analysis of cytokines expression in CFBE cells after different stimuli. CFBE cells were incubated with PBS (CTRL), 10  $\mu$ g/mL of LPS, 30 ng/mL IL-1 $\beta$ + 100  $\mu$ M H<sub>2</sub>O<sub>2</sub> or 30 ng/mL IL-1 $\beta$ +30 ng/mL TNF- $\alpha$  for 4 h. The qRT-PCR was performed in order to quantify IL-1 $\beta$ , IL-6, IL-8, IL-17A and TNF- $\alpha$  mRNA normalized to untreated control. Results are shown as fold induction where CTRL is equal to 1. Data represent the mean  $\pm$  SD ( $n = 4$ ). \* $p < 0.05$ ; \*\* $p < 0.01$ ; \*\*\* $p < 0.001$ ; \*\*\*\* $p < 0.0001$ .
